# Supplementary material
Source: Springer Nature journal article supplement (https://www.springermedizin.de/resource/supplementary/12958_2008_472_MOESM1_ESM.pdf/9567982)
Supplement: MOESM1 [file 9567982]

**(A)**

E13 Endometrium  
 Day 25 Endometrium  
 Day 60 CAR  
 Day 150 CAR  
 Day 250 CAR  
 E13 ICAR  
 Day 60 ICAR  
 Day 250 ICAR

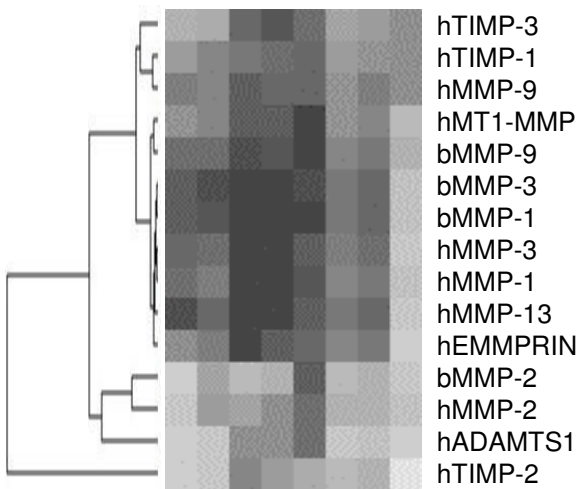

-5 0 5

**(B)**

Day 25 Conceptus  
 Day 60 COT  
 Day 150 COT  
 Day 250 COT  
 Day 250 ICOT

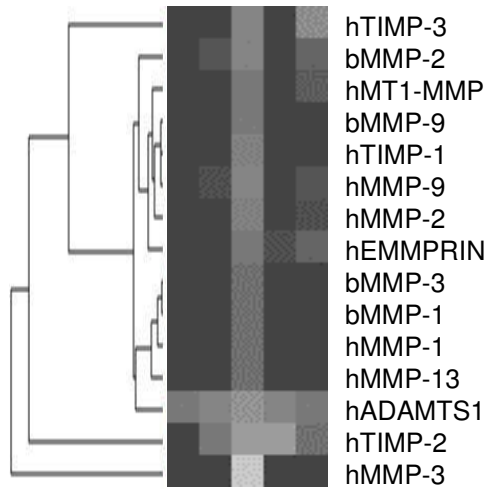

-5 0 5
